# Supplementary material
Source: Springer Nature journal article supplement (https://www.springermedizin.de/resource/supplementary/12936_2009_1052_MOESM1_ESM.pdf/9548874)

CMT: Compartment  
F: Oral bioavailability  
D: AS dose  
Ka: Absorption rate constant  
CL: AS clearance  
V2: Central volume of distribution for AS  
CLM: DHA clearance  
V3: Central volume of distribution for DHA  
Q: Inter-compartmental clearance  
V4: Peripheral volume of distribution for DHA

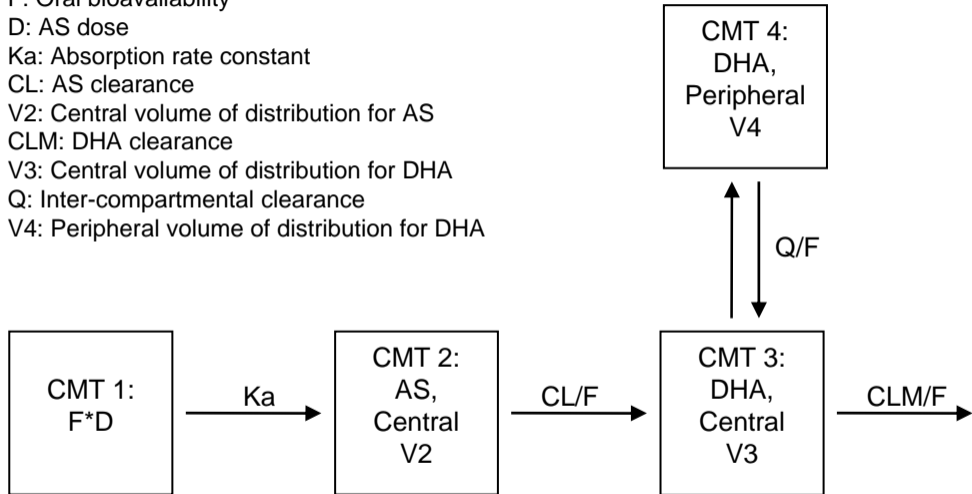

Supplement: MOESM1 [file 9548874]
